# Supplementary material
Source: Springer Nature journal article supplement (https://www.springermedizin.de/resource/supplementary/12887_2010_424_MOESM1_ESM.pdf/9475066)

Age of infants at time of blood sample

48-72 Hours  
24-48 Hours  
6-24 Hours  
2-6 Hours  
0-2 Hours

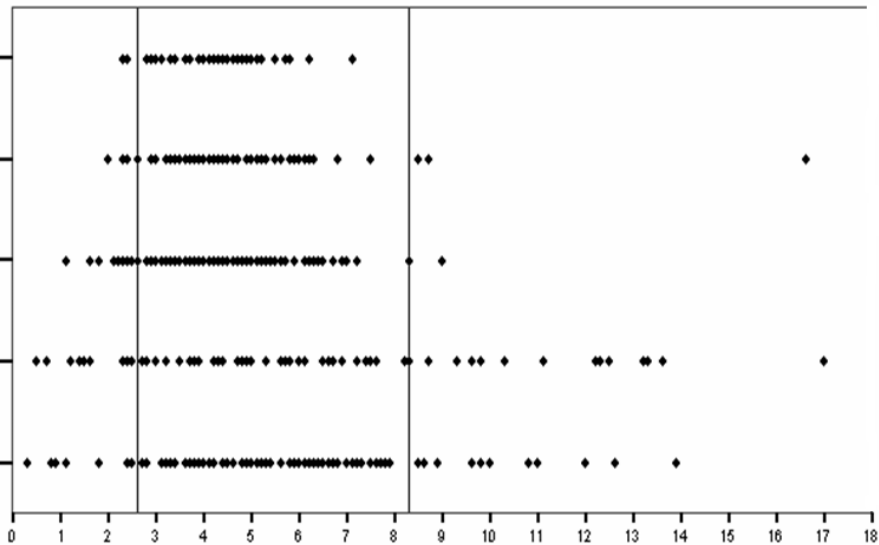

Supplement: MOESM1 [file 9475066]
